# Supplementary material for: Novel PDMS-Based Sensor System for MPWM Measurements of Picoliter Volumes in Microfluidic Devices
Source: PubMed Central journal article supplement (PMC6891790; doi:10.3390/s19224886), 2019-11-08
Supplement: sensors-19-04886-s001.pdf [file sensors-19-04886-s001.pdf]

## Supplementary Materials: Novel PDMS-based Sensor System for MPWM Measurements of Picoliter Volumes in Microfluidic Devices

Mihăiță Nicolae Ardeleanu <sup>1,2</sup>, Ileana Nicoleta Popescu <sup>1,\*</sup>, Iulian Nicolae Udriou <sup>3</sup>, Emil Mihai Diaconu <sup>3</sup>, Simona Mihai <sup>4</sup>, Emil Lungu <sup>5</sup>, Badriyah Alhalaili <sup>6</sup> and Ruxandra Vidu <sup>7,8,\*</sup>

**Table 2.** Straight channels fabrication of 1D<sup>1</sup>, 2D<sup>2</sup> or 3D<sup>3</sup> microchannel fabrication in PDMS.

| Preparation of Microwires, Substrate or Supports                                                                                                  | Curing Parameters | Microwire Removal and /or Others Processing Steps                                                                                                                                                            | Ref.              |
|---------------------------------------------------------------------------------------------------------------------------------------------------|-------------------|--------------------------------------------------------------------------------------------------------------------------------------------------------------------------------------------------------------|-------------------|
| Stretching out nylon between two rigid supports; Spreading Nylon in a pool of PDMS liquid                                                         |                   | Nylon wires removal: Swelling PDMS in pool of CHCl <sub>3</sub> (PDMS swell 15% by length). De-swelling by drying at 25 °C in atm.                                                                           | [55] <sup>1</sup> |
| Templates fabrication: Hot pressed (100 °C) of nylon (at normal directions); casting the PDMS on a 250 μm channel                                 | 90 °C for 1h      | Swelling PDMS network templates with 70/30 CHCl <sub>3</sub> and Et3N solvent (PDMS swell: 25-35% by length); 1 <sup>st</sup> Drawn Out the 50 μm, wire and 2 <sup>nd</sup> the 250 μm wire                  | [52] <sup>2</sup> |
| The nylon was spun in the form of a helix around a rigid rod (Φ=100-500 μm, heated (100 °C) wire and rod.                                         |                   | Immersion of the helix in CHCl <sub>3</sub> and Et3N (70:30 v/v) solvent (30-40% (by length swelling of the PDMS). 5 g load was to remove wire.                                                              | [55]              |
| Glass substrat and wires cleaning <sup>4,5</sup><br>Aligning the wires on glass slide /PMMA supporting frame                                      |                   | Swelling PDMS by immersion for 2-8 h into ethanol pool (swelling coefficient 1.04); Drown Out wires from the PDMS                                                                                            | [51]              |
| Channel intersection formed by mechanical pressing/micro contacting and microspotting                                                             | 60 °C for 2 h     | Immersion for 6 h into alcohol (using ultrasonic oscillation), for swelling, pulled out the wires from the PDMS block                                                                                        | [52]              |
| Glass substrate and wires cleaning <sup>4,5</sup><br>Curving and aligning wire                                                                    |                   | Immersion it in hexane for 4-8 h. Carefully drew out the microwire                                                                                                                                           | [53]              |
| Degassing PDMS mixture; Aligning the wires and stretching its inside the semicylindrical mold cavity                                              | 100 °C for 35 min | Swelling PDMS by immersion in a 70/30 (v/v) of Chloroform and Diisopropylamine                                                                                                                               | [52]              |
| Degassing PDMS mixture. Winding around a rigid rod                                                                                                |                   | Pulling Off the WIRES from the PDMS. Droplet Formation                                                                                                                                                       | [53]              |
| Isopropanol cleaning and DI water; dried with nitrogen gas; aligned microwires; fixed in a mold                                                   | 80 °C for 2 h     | PDMS Cutting; Swelling PDMS (6 h into alcohol, with ultrasonic oscillation); Pulled Out the wires; Punching orifices using a needle; Sealing.                                                                | [51]              |
| Winding the soldering wire on an inflexible base rod (iron pin) with a curvature radius of 300 μm for making helical or double-helical structures | 100 °C for 1 h    | Metal wire removed by heating in convective oven with vacuum pump; Vacuum pump suction: 45 l/min, T = 190 °C. PDMS solutions diluted with curing agent for coating channels, surface treatments <sup>6</sup> | [54]              |

<sup>1</sup> Fabrication the straight channels by embedding wire inside the PDMS <sup>51, 53, 55</sup>, <sup>2</sup> Fabrication the cross channel (2D structures) <sup>53</sup>; <sup>3</sup> Fabrication of helical <sup>52-55</sup> or curving <sup>53</sup> micro-channels. <sup>4</sup> Glass substrate and wires cleaning: O<sub>2</sub> plasma t = 5 min, pO<sub>2</sub> = 0.1 MPa, power 30 W <sup>53,5</sup> Ultrasonic cleaning in acetone, ethanol and Millipore pure water = 10 min, dried by N<sub>2</sub> <sup>53</sup>; <sup>6</sup> Corona discharge treatment to increase the hydrophilicity; sterilization (with 70% ethanol), DI washing <sup>54</sup>.

**Commented [M1]:** Please consider this suggested change and please format all the references in the table in that way.

**Table 3.** MPWM calibration data, for duty cycle of 13.5–14.5 %, at 100 Hz and 256 mbar.

| Duty Cycle                          |                                   |                        |                                     |                                   |                        |                                     |                                   |                        |                                     |                                   |                        |
|-------------------------------------|-----------------------------------|------------------------|-------------------------------------|-----------------------------------|------------------------|-------------------------------------|-----------------------------------|------------------------|-------------------------------------|-----------------------------------|------------------------|
| 13.50%                              |                                   |                        | 13.75%                              |                                   |                        | 14.00%                              |                                   |                        | 14.50%                              |                                   |                        |
| X <sub>k-1</sub><br>Virtual<br>Unit | X <sub>k</sub><br>Virtual<br>Unit | V <sub>k</sub><br>(pL) | X <sub>k-1</sub><br>Virtual<br>Unit | X <sub>k</sub><br>Virtual<br>Unit | V <sub>k</sub><br>(pL) | X <sub>k-1</sub><br>Virtual<br>Unit | X <sub>k</sub><br>Virtual<br>Unit | V <sub>k</sub><br>(pL) | X <sub>k-1</sub><br>Virtual<br>Unit | X <sub>k</sub><br>Virtual<br>Unit | V <sub>k</sub><br>(pL) |
| 83890                               | 84010                             | 30.8                   | 83897                               | 84042                             | 37.27                  | 83860                               | 84042                             | 46.78                  | 82811                               | 83078                             | 68.63                  |
| 83779                               | 83890                             | 28.5                   | 83739                               | 83897                             | 40.61                  | 83683                               | 83860                             | 45.5                   | 82550                               | 82811                             | 67.09                  |
| 83668                               | 83779                             | 28.5                   | 83586                               | 83739                             | 39.33                  | 83511                               | 83683                             | 44.21                  | 82284                               | 82550                             | 68.37                  |
| 83549                               | 83668                             | 30.6                   | 83437                               | 83586                             | 38.3                   | 83334                               | 83511                             | 45.5                   | 82023                               | 82284                             | 67.09                  |
| 83438                               | 83549                             | 28.5                   | 83288                               | 83437                             | 38.3                   | 83162                               | 83334                             | 44.21                  | 81744                               | 82023                             | 71.71                  |
| 83323                               | 83438                             | 29.6                   | 83144                               | 83288                             | 37.01                  | 82985                               | 83162                             | 45.5                   | 81466                               | 81744                             | 71.46                  |
| 83208                               | 83323                             | 29.6                   | 82995                               | 83144                             | 38.3                   | 82798                               | 82985                             | 48.07                  | 81205                               | 81466                             | 67.09                  |
| 83097                               | 83208                             | 28.5                   | 82837                               | 82995                             | 40.61                  | 82627                               | 82798                             | 43.95                  | 80944                               | 81205                             | 67.09                  |
| 82986                               | 83097                             | 28.5                   | 82683                               | 82837                             | 39.58                  | 82445                               | 82627                             | 46.78                  | 80666                               | 80944                             | 71.46                  |
| 82863                               | 82986                             | 31.6                   | 82539                               | 82683                             | 37.01                  | 82263                               | 82445                             | 46.78                  | 80405                               | 80666                             | 67.09                  |
| 82739                               | 82863                             | 31.8                   | 82385                               | 82539                             | 39.58                  | 82086                               | 82263                             | 45.5                   | 80145                               | 80405                             | 66.83                  |
| 82624                               | 82739                             | 29.5                   | 82232                               | 82385                             | 39.33                  | 81899                               | 82086                             | 48.07                  | 79866                               | 80145                             | 71.71                  |
| 82509                               | 82624                             | 29.5                   | 82074                               | 82232                             | 40.61                  | 81722                               | 81899                             | 45.5                   | 79600                               | 79866                             | 68.37                  |
| 82398                               | 82509                             | 28.5                   | 81930                               | 82074                             | 37.01                  | 81536                               | 81722                             | 47.81                  | 79339                               | 79600                             | 67.09                  |
| 82283                               | 82398                             | 29.5                   | 81785                               | 81930                             | 37.27                  | 81354                               | 81536                             | 46.78                  | 79072                               | 79339                             | 68.63                  |
| 82172                               | 82283                             | 28.5                   | 81627                               | 81785                             | 40.61                  | 81182                               | 81354                             | 44.21                  | 78800                               | 79072                             | 69.91                  |
| 82057                               | 82172                             | 29.5                   | 81478                               | 81627                             | 38.3                   | 81010                               | 81182                             | 44.21                  | 78527                               | 78800                             | 70.17                  |
| 81934                               | 82057                             | 31.6                   | 81329                               | 81478                             | 38.3                   | 80823                               | 81010                             | 48.07                  | 78255                               | 78527                             | 69.91                  |
| 81823                               | 81934                             | 28.5                   | 81185                               | 81329                             | 37.01                  | 80646                               | 80823                             | 45.5                   | 77976                               | 78255                             | 71.71                  |
| 81703                               | 81823                             | 30.8                   | 81041                               | 81185                             | 37.01                  | 80464                               | 80646                             | 46.78                  | 77715                               | 77976                             | 67.09                  |
| 81588                               | 81703                             | 29.6                   | 80892                               | 81041                             | 38.29                  | 80293                               | 80464                             | 43.95                  | 77437                               | 77715                             | 71.46                  |
| 81469                               | 81588                             | 30.9                   | 80743                               | 80892                             | 38.3                   | 80116                               | 80293                             | 45.5                   | 77165                               | 77437                             | 69.91                  |
| 81354                               | 81469                             | 29.6                   | 80589                               | 80743                             | 39.58                  | 79939                               | 80116                             | 45.5                   | 76892                               | 77165                             | 70.17                  |

**Table 4.** MPWM calibration data, for duty cycle of 15–16.8 %, at 100 Hz and 256 mbar.

| Duty Cycle                          |                                   |                        |                                     |                                   |                        |                                     |                                   |                        |                                     |                                   |                        |
|-------------------------------------|-----------------------------------|------------------------|-------------------------------------|-----------------------------------|------------------------|-------------------------------------|-----------------------------------|------------------------|-------------------------------------|-----------------------------------|------------------------|
| 13.50%                              |                                   |                        | 13.75%                              |                                   |                        | 14.00%                              |                                   |                        | 14.50%                              |                                   |                        |
| X <sub>k-1</sub><br>Virtual<br>Unit | X <sub>k</sub><br>Virtual<br>Unit | V <sub>k</sub><br>(pL) | X <sub>k-1</sub><br>Virtual<br>Unit | X <sub>k</sub><br>Virtual<br>Unit | V <sub>k</sub><br>(pL) | X <sub>k-1</sub><br>Virtual<br>Unit | X <sub>k</sub><br>Virtual<br>Unit | V <sub>k</sub><br>(pL) | X <sub>k-1</sub><br>Virtual<br>Unit | X <sub>k</sub><br>Virtual<br>Unit | V <sub>k</sub><br>(pL) |
| 83612                               | 83932                             | 82.2                   | 85719                               | 86164                             | 114.4                  | 85312                               | 85836                             | 134.7                  | 86519                               | 87113                             | 152.7                  |
| 83293                               | 83612                             | 82                     | 85275                               | 85719                             | 114.1                  | 84775                               | 85312                             | 138                    | 85914                               | 86519                             | 155.5                  |
| 82968                               | 83293                             | 83.5                   | 84834                               | 85275                             | 113.4                  | 84247                               | 84775                             | 135.7                  | 85315                               | 85914                             | 154                    |
| 82637                               | 82968                             | 85.1                   | 84390                               | 84834                             | 114.1                  | 83715                               | 84247                             | 136.7                  | 84721                               | 85315                             | 152.7                  |
| 82323                               | 82637                             | 80.7                   | 83949                               | 84390                             | 113.4                  | 83191                               | 83715                             | 134.7                  | 84127                               | 84721                             | 152.7                  |
| 82004                               | 82323                             | 82                     | 83504                               | 83949                             | 114.4                  | 82663                               | 83191                             | 135.7                  | 83517                               | 84127                             | 156.8                  |
| 81679                               | 82004                             | 83.5                   | 83064                               | 83504                             | 113.1                  | 82131                               | 82663                             | 136.7                  | 82913                               | 83517                             | 155.3                  |
| 81365                               | 81679                             | 80.7                   | 82623                               | 83064                             | 113.4                  | 81599                               | 82131                             | 136.7                  | 82313                               | 82913                             | 154.2                  |
| 81035                               | 81365                             | 84.8                   | 82185                               | 82623                             | 112.6                  | 81062                               | 81599                             | 138                    | 81719                               | 82313                             | 152.7                  |
| 80715                               | 81035                             | 82.2                   | 81737                               | 82185                             | 115.2                  | 80525                               | 81062                             | 138                    | 81125                               | 81719                             | 152.7                  |
| 80396                               | 80715                             | 82.0                   | 81289                               | 81737                             | 115.2                  | 79997                               | 80525                             | 135.7                  | 80531                               | 81125                             | 152.7                  |
| 80076                               | 80396                             | 82.3                   | 80845                               | 81289                             | 114.1                  | 79473                               | 79997                             | 134.7                  | 79927                               | 80531                             | 155.3                  |
| 79762                               | 80076                             | 80.7                   | 80397                               | 80845                             | 115.2                  | 78937                               | 79473                             | 137.8                  | 79322                               | 79927                             | 155.5                  |
| 79438                               | 79762                             | 83.3                   | 79953                               | 80397                             | 114.1                  | 78404                               | 78937                             | 137                    | 78728                               | 79322                             | 152.7                  |
| 79124                               | 79438                             | 80.7                   | 79505                               | 79953                             | 115.2                  | 77872                               | 78404                             | 136.7                  | 78129                               | 78728                             | 154                    |
| 78799                               | 79124                             | 83.5                   | 79057                               | 79505                             | 115.2                  | 77344                               | 77872                             | 135.7                  | 77519                               | 78129                             | 156.8                  |
| 78485                               | 78799                             | 80.7                   | -                                   | -                                 | -                      | -                                   | -                                 | -                      | -                                   | -                                 | -                      |
| 78171                               | 78485                             | 80.7                   | -                                   | -                                 | -                      | -                                   | -                                 | -                      | -                                   | -                                 | -                      |
| 77851                               | 78171                             | 82.3                   | -                                   | -                                 | -                      | -                                   | -                                 | -                      | -                                   | -                                 | -                      |
